# Supplementary material for: Targeting the NLRP3 Inflammasome With Inhibitor MCC950 Prevents Aortic Aneurysms and Dissections in Mice
Source: PubMed Central journal article supplement — J Am Heart Assoc. 2020 Mar 30;9(7):e014044. doi: 10.1161/JAHA.119.014044 (PMC7428617; doi:10.1161/jaha.119.014044), 2020-03-30
Supplement: JAH3-9-e014044-s001.pdf [file JAH3-9-e014044-s001.pdf]

# **Supplemental Material**

**Figure S1. Effect of MCC950 on blood pressure, body weight, blood glucose level, and lipid profile in unchallenged and challenged mice treated with saline or MCC950.**

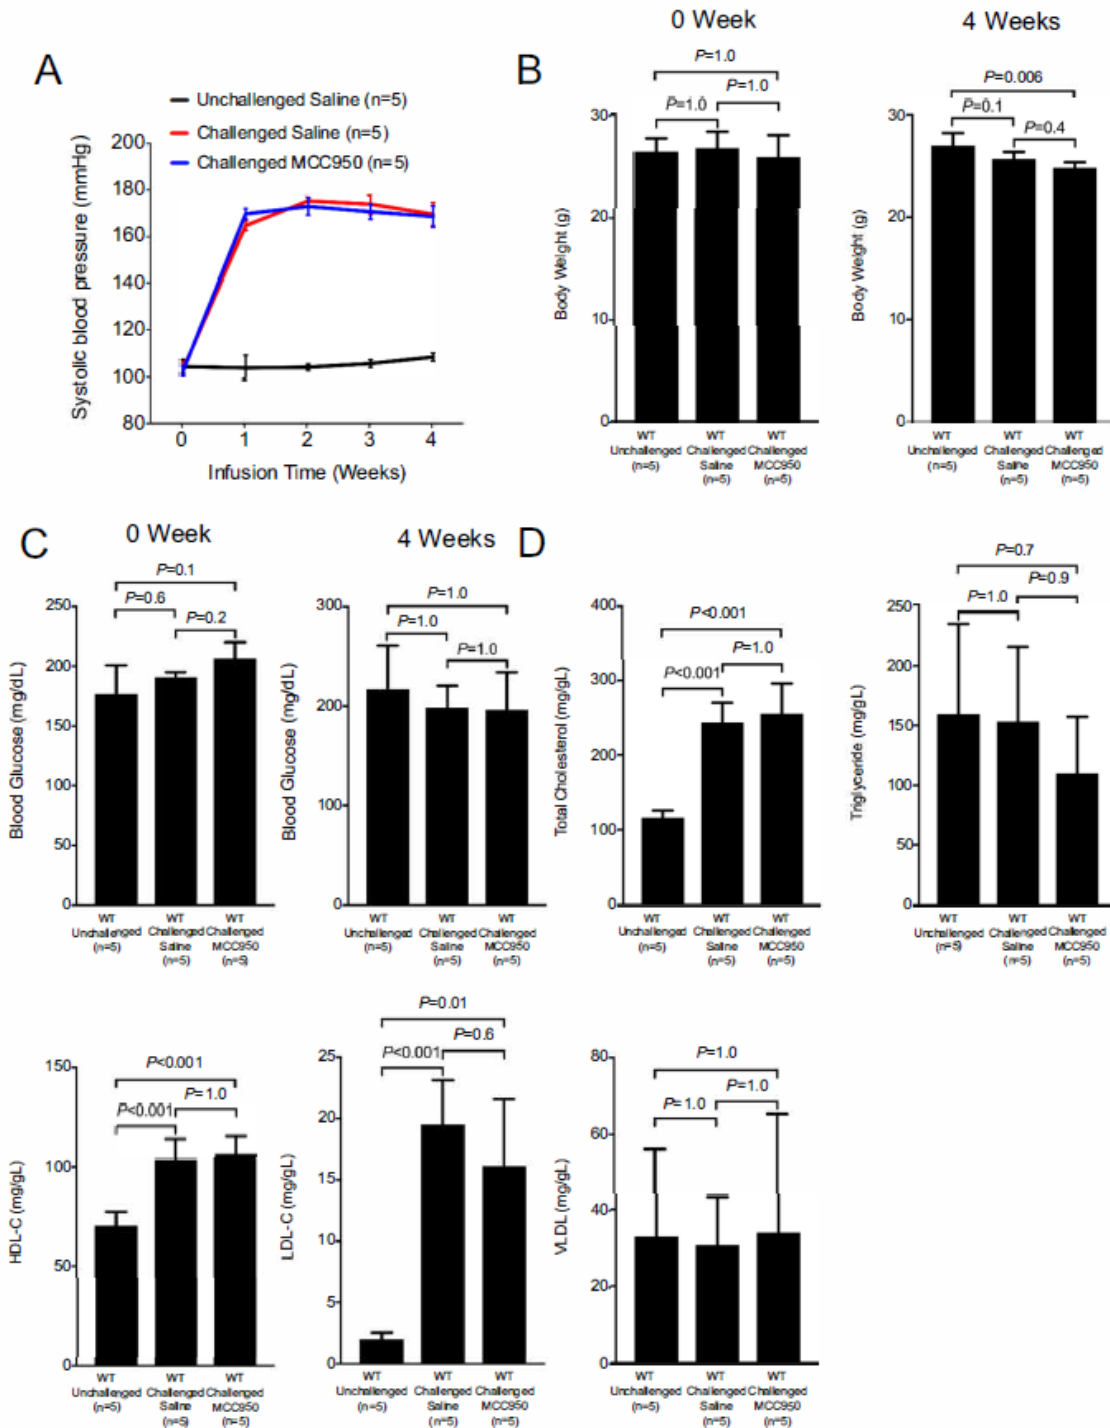

(A) Systolic blood pressure in mice before and after 4 weeks of angiotensin II (AngII) infusion (n=5). (B-C) Body weight and blood glucose level before and after 4 weeks of AngII infusion (n=5). (D) Blood serum total cholesterol, triglyceride, very low-density lipoprotein (VLDL), low-density lipoprotein cholesterol (LDL-C), and high-density lipoprotein cholesterol (HDL-C) levels after 4 weeks of AngII infusion (n=5). Data are presented as the mean  $\pm$  standard error of the mean. One-way ANOVA with the post-hoc Tukey test was used for pairwise comparisons.
